# Supplementary material for: Urban Heatwave Resilience and Spatial Drivers: A 20-Year Geo-Spatial Analysis in Chengdu, China
Source: Research Square preprint supplement (doi:10.21203/rs.3.rs-7374786/v1), 2025-11-05
Supplement: Supplementary file 1 [file 5dd96ab673fcce3ed26d2dd3.docx]

**Highlights：**

- Introduces two thermal environment resilience metrics (Stability’ and ‘Resistance’) and an integrated GWRF-SHAP framework to assess heatwave risk and its non-stationary drivers.
- Heatwave risk and resilience show a ‘center-periphery’ spatial pattern of synchronous degradation, forming a ‘dual vulnerability’ hotspot in the urban core.
- Land use patterns are the dominant driver of heat risk, but their effects, such as the cooling from green spaces, are spatially non-stationary and weaken in fragmented urban cores.
- This study reveals the dual role of Aerosol Optical Depth (AOD) in modulating surface temperatures during heatwaves. While AOD typically induces surface cooling by reducing incoming solar radiation, we found that this effect can invert to a net warming mechanism under extreme heat and drought, which intensifies heatwave conditions.
